# Supplementary material
Source: Springer Nature journal article supplement (https://www.springermedizin.de/resource/supplementary/12990_2007_93_MOESM7_ESM.pdf/9612552)

### Morphine, 1<sup>st</sup> dose

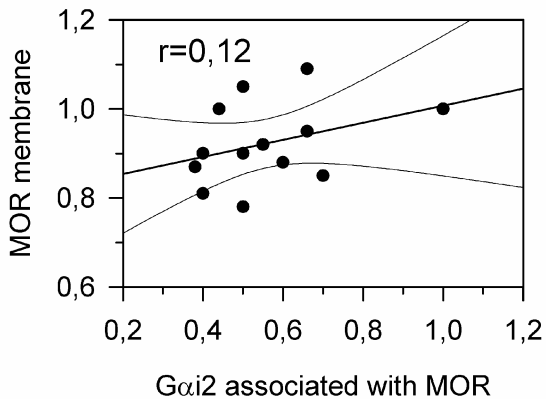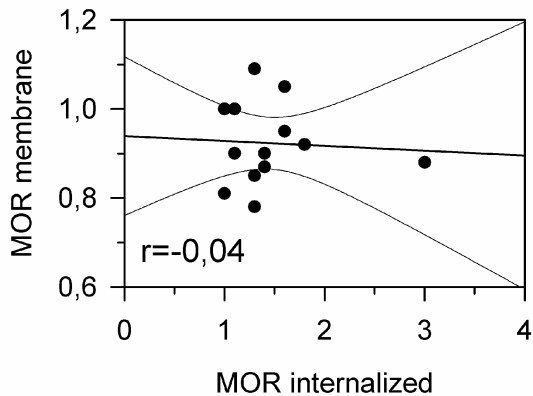

### Morphine, 2<sup>nd</sup> dose (+ 6h)

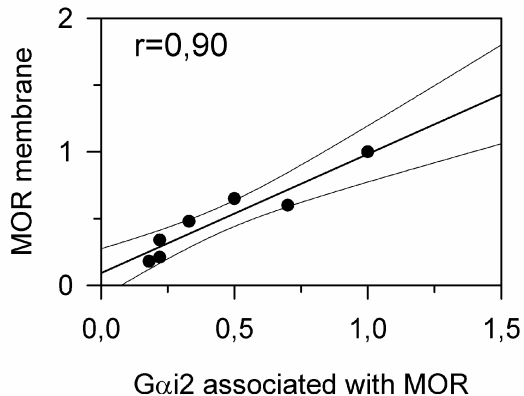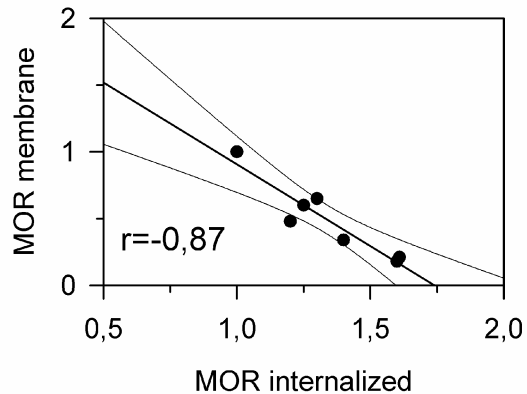

### DAMGO, 1<sup>st</sup> dose

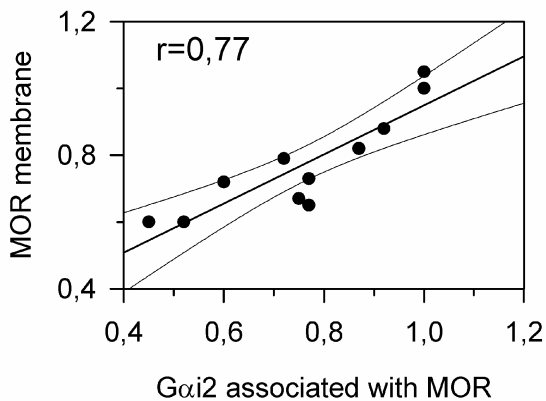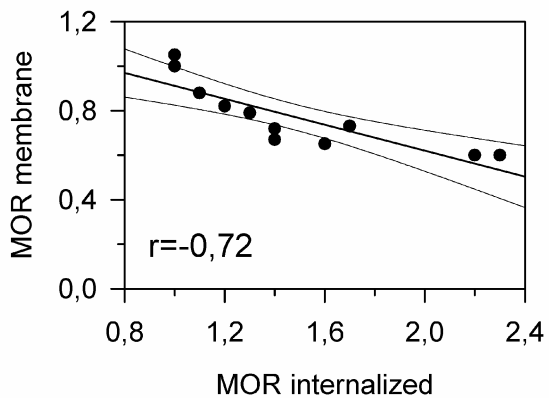

Supplement: MOESM7 [file 9612552]
